# Supplementary material for: Oxygen molecule dissociation on carbon nanostructures with different types of nitrogen doping
Source: Royal Society of Chemistry journal article supplement (doi:10.1039/c1nr11086a), 2011-12-07
Supplement: c1nr11086a.pdf [file c1nr11086a.pdf]

**Table 1** The geometric structures of initial state, medium state and final state of oxygen dissociation on different carbon structures (unit: Å)

| Structure |              | Initial state | Medium state | Final state   |
|-----------|--------------|---------------|--------------|---------------|
| Fig. 1a   | do-o         | 1.24          | 1.51         | 3.02          |
|           | average dc-o | 3.31          | 1.48         | 1.45          |
| Fig. 1b   | dc-o         | 1.25          | 1.51         | 2.77          |
|           | average dc-o | 3.31          | 1.48         | 1.45          |
|           | dc=O         |               |              | 1.29          |
| Fig. 1c   | do-o         | 1.37          | 1.51         | 2.75          |
|           | dc-o         | 1.48          | 1.56         | 1.46(average) |
|           |              | 2.32          | 1.45         |               |
|           | dc=O         |               |              | 1.22          |
| Fig. 1d   | do-o         | 1.25          | 1.50         | 2.76          |
|           | average dc-o | 3.51          | 1.47         |               |
|           | average dc=O |               |              | 1.23          |
| Fig. 1e   | do-o         | 1.33          | 1.51         | 2.40          |
|           | dc-o         | 1.51          | 1.44         | 1.32          |
|           |              | 2.35          | 1.65         | 1.65          |
|           | dc=O         |               |              | 1.23          |
| Fig. 1f   | do-o         | 1.24          | 1.51         | 2.65          |
|           | average dc-o | 3.58          | 1.45         |               |
|           | average dc=O |               |              | 1.22          |
| Fig. 2a   | do-o         | 1.24          | 1.50         | 2.87          |
|           | average dc-o | 3.55          | 1.50         | 1.47          |
| Fig. 2b   | do-o         | 1.26          | 1.49         | 2.67          |
|           | average dc-o | 3.31          | 1.51         | 1.45          |
|           | dc=O         |               |              | 1.30          |
| Fig. 2c   | do-o         | 1.26          | 1.49         | 2.65          |
|           | average dc-o | 3.09          | 1.50         |               |
|           | dc=O         |               |              | 1.31          |
| Fig. 2d   | do-o         | 1.24          | 1.49         | 2.80          |
|           | average dc-o | 3.47          | 1.49         | 1.45          |

**Table 2** The energy barriers and the adsorption energies of initial state, medium state and final state of oxygen dissociation on different carbon structures (unit: eV)

| structure | Initial state | Medium state | Final state | Barrier <sub>1</sub> | Barrier <sub>2</sub> | Barrier <sub>total</sub> |
|-----------|---------------|--------------|-------------|----------------------|----------------------|--------------------------|
| Fig. 1a   | 0.01          | -0.92        | 0.27        | 1.61                 | 1.43                 | 1.61                     |
| Fig. 1b   | 0.04          | -0.49        | 0.39        | 0.86                 | 0.70                 | 0.86                     |
| Fig. 1c   | 0.18          | -0.11        | 1.97        | 0.35                 | 0.42                 | 0.42                     |
| Fig. 1d   | 0.11          | 0.64         | 2.70        | 0.69                 | -0.18                | 0.69                     |
| Fig. 1e   | 0.49          | 0.37         | 3.70        | 0.49                 | 0.30                 | 0.49                     |
| Fig. 1f   | 0.01          | -0.44        | 1.18        | 1.28                 | 1.24                 | 1.28                     |
| Fig. 2a   | 0.03          | -2.08        | -1.53       | 2.62                 | 2.71                 | 2.71                     |
| Fig. 2b   | 0.14          | -1.41        | -0.95       | 1.73                 | 1.87                 | 1.87                     |
| Fig. 2c   | 0.19          | 0.30         | 1.56        | 0.19                 | 0.02                 | 0.19                     |
| Fig. 2d   | 0.12          | -1.53        | -1.11       | 1.71                 | 2.34                 | 2.34                     |

The Fig. 1 and Fig. 2 are showed in the main text.
